# Supplementary figures and images for: Identification of the Sex-Biased Gene Expression and Putative Sex-Associated Genes in Eucommia ulmoides Oliver Using Comparative Transcriptome Analyses
Source: MDPI journal article supplement (doi:10.3390/molecules22122255), 2017-12-18

# PYRUVATE METABOLISM

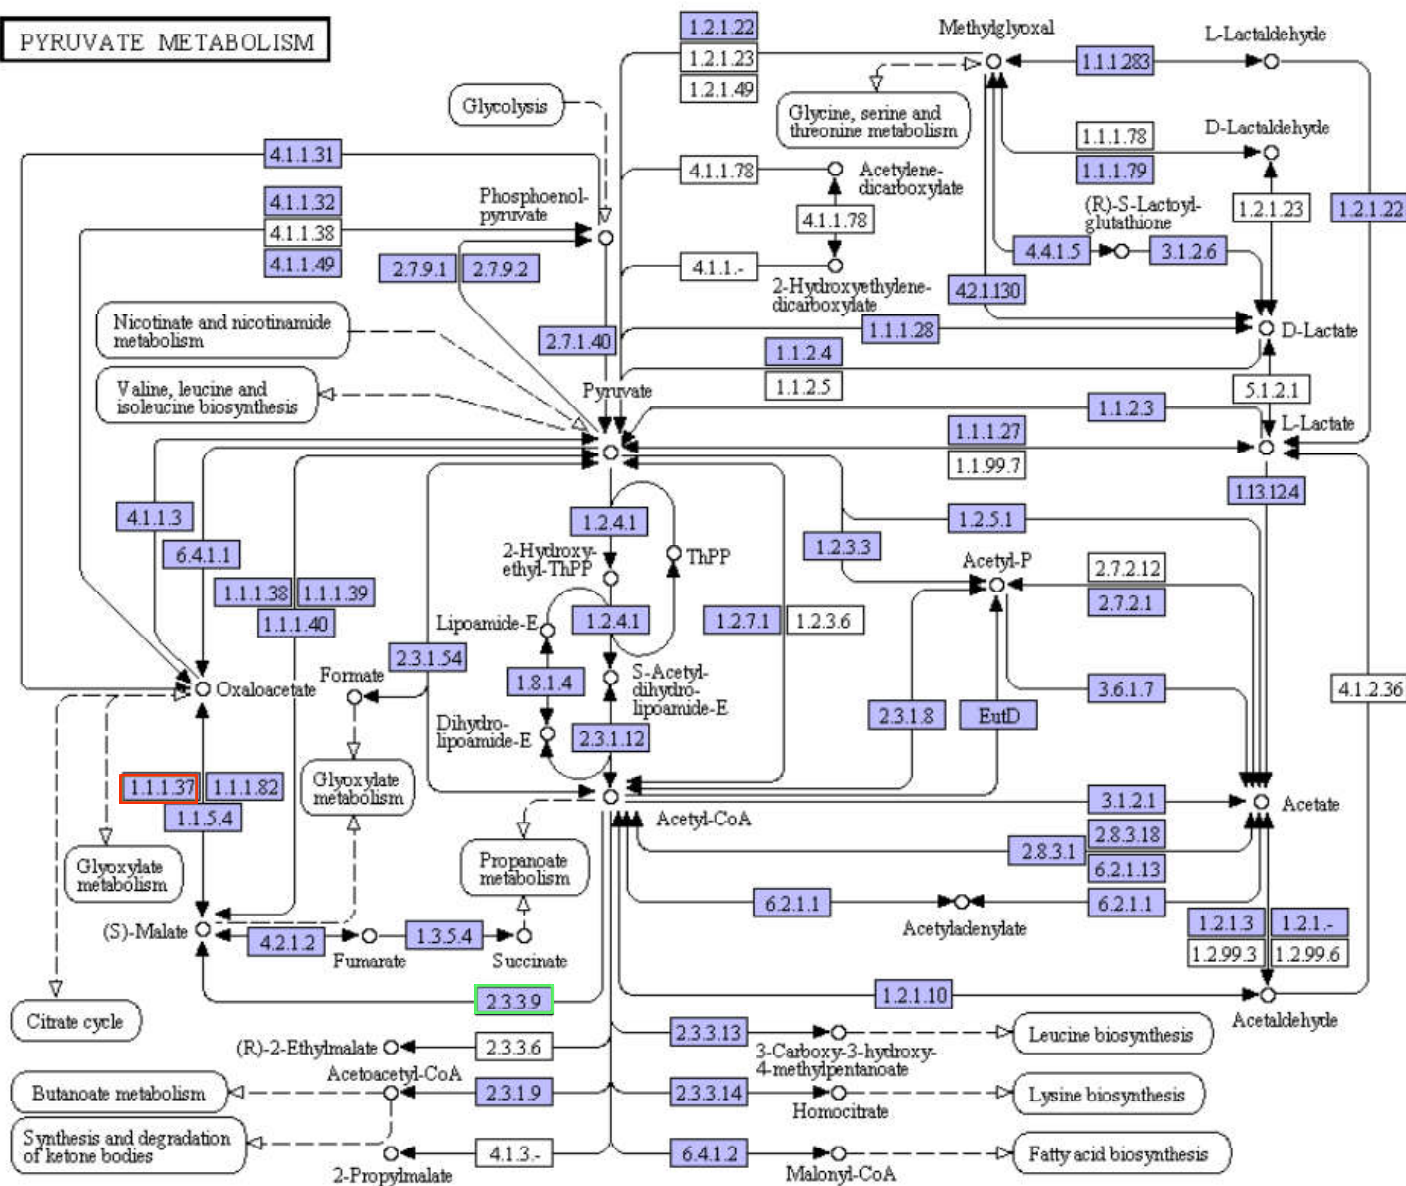

Supplement: s1 [file s1]
